# Supplementary material for: Incidence of Tuberculosis Infection and Disease in Household Contacts of Multidrug-Resistant Pulmonary Tuberculosis Patients
Source: Research Square preprint supplement (doi:10.21203/rs.3.rs-7656305/v1), 2025-12-02
Supplement: Supplementary file 1 [file 31104db11aad1ea1c91368ef.docx]

Title: **Incidence of Tuberculosis Infection and Disease in Household Contacts of Multidrug- Resistant Pulmonary Tuberculosis Patients**

**Appendix 1**

**Case record form**

**MDR/RR-TB Patient ID: ________**

1. Patient ID: Date
2. Name: Age Sex
3. Occupation: Relation with MDR TB patient:
4. Address & contact no:
5. Clinical findings (Baseline investigations)

Height (cm)- Weight (kg)- BMI kg/m2

Mantoux test (5TU) (mm) Positive/ Negative

BCG vaccine scar: Yes/ No

1. Chest radiograph (if symptomatic patient)

Normal Abnormal

1. Number of active cases found at baseline:

**History**

Educational Level:

Smoking history: yes/no

If yes, total number of packs/year:

Alcohol intake (never=1, Yes, in the past=2, Yes, current user=3)

Frequency: (current=1 Less than a week=2, 1-3 time a week=3, >3 time a week=4)

History of substance abuse (Yes=Y, No=N):

If yes, which substance and for how long?

Marital status: (Married/Unmarried/Separated or divorced)

Co-morbid condition: DM/HTN/CAD/CKD/ any other _________.

Immunosuppressive drugs/steroid: Yes/No

Total household income:

Education status (Head of family):

Type of house: Kuccha/ Pakka,

No of rooms:

Total number of family members:

**Index patient:**

Duration of treatment

Basis of diagnosis: Microbiological evidence ______

| **Symptoms (Yes=Y, No=N)** | **6 months** | **12 months** | **18 months** | **24 months** |
| --- | --- | --- | --- | --- |
| **Fever** |  |  |  |  |
| **Night sweats** |  |  |  |  |
| **Anorexia** |  |  |  |  |
| **Weight loss** |  |  |  |  |
| **Cough** |  |  |  |  |
| **Expectoration** |  |  |  |  |
| **Hemoptysis** |  |  |  |  |
| **Breathlessness** |  |  |  |  |
| **Chest pain** |  |  |  |  |

**Clinical details:**

If TB disease develops during follow up- No of days after which occurs-

Duration of symptoms, if symptomatic:

Diagnostic workup if symptomatic:

| **Test** | **Report** |
| --- | --- |
| Sputum AFB |  |
| Sputum CBNAAT |  |
| Chest X-ray |  |
| CT Chest (if done) |  |

| Basis of diagnosis |  |
| --- | --- |
| DRTB/ DS TB |  |
| Duration of therapy |  |

**Name of Principal Investigator:** Dr. Pankaj Jorwal, Additional Professor, Department of Medicine, AIIMS, New Delhi, Phone No. 011-2659-4001
